# Supplementary material for: Substrate Role in Polaron Formation on Single-layer Transition Metal Dihalides
Source: Research Square preprint supplement (doi:10.21203/rs.3.rs-8419446/v1), 2025-12-29
Supplement: Supplementary file 1 [file 99f55b604a24dcf2b007ea3b.pdf]

**Supplementary Information**  
**Polarons in single-layer MnBr<sub>2</sub>: properties and dependence on**  
**the substrate**

Affan Safeer,<sup>1,\*</sup> Oktay Güteryüz,<sup>1</sup> Guangyao Miao,<sup>1</sup>  
Wouter Jolie,<sup>1</sup> Thomas Michely,<sup>1</sup> and Jeison Fischer<sup>1</sup>

<sup>1</sup>*II. Physikalisches Institut, Universität zu Köln,  
Zùlpicher Straße 77, 50937 Köln, Germany*

---

\* safeer@ph2.uni-koeln.de

## CONTENTS

|                                                                                                                                           |    |
|-------------------------------------------------------------------------------------------------------------------------------------------|----|
| Supplementary note 1: Extended dataset for bias-dependent polaron imaging and mobility.                                                   | 3  |
| Supplementary note 2: Mobility of type-I mobile polaron for lower positive $V_b$ at large tunneling current                               | 5  |
| Supplementary Note 3: Overview topographs of single-layer $\text{MnBr}_2$ grown on different substrates.                                  | 6  |
| Supplementary note 4: Polarons in $\text{MnBr}_2$ on $\text{Gr}/\text{Ir}(111)$                                                           | 7  |
| Supplementary note 5: Tip induced conversions of type-II $1\times 1$ polarons into type-I mobile polarons.                                | 8  |
| Supplementary note 6: Creation of a type-I $1\times 1$ mobile polaron in $\text{MnBr}_2$ on $\text{Gr}/\text{Ir}(111)$ .                  | 9  |
| Supplementary note 7: Bias dependent absolute tip heights above $\text{Gr}/\text{Ir}(110)$ and $\text{MnBr}_2/\text{Gr}/\text{Ir}(110)$ . | 10 |

**Supplementary note 1: Extended dataset for bias-dependent polaron imaging and mobility.**

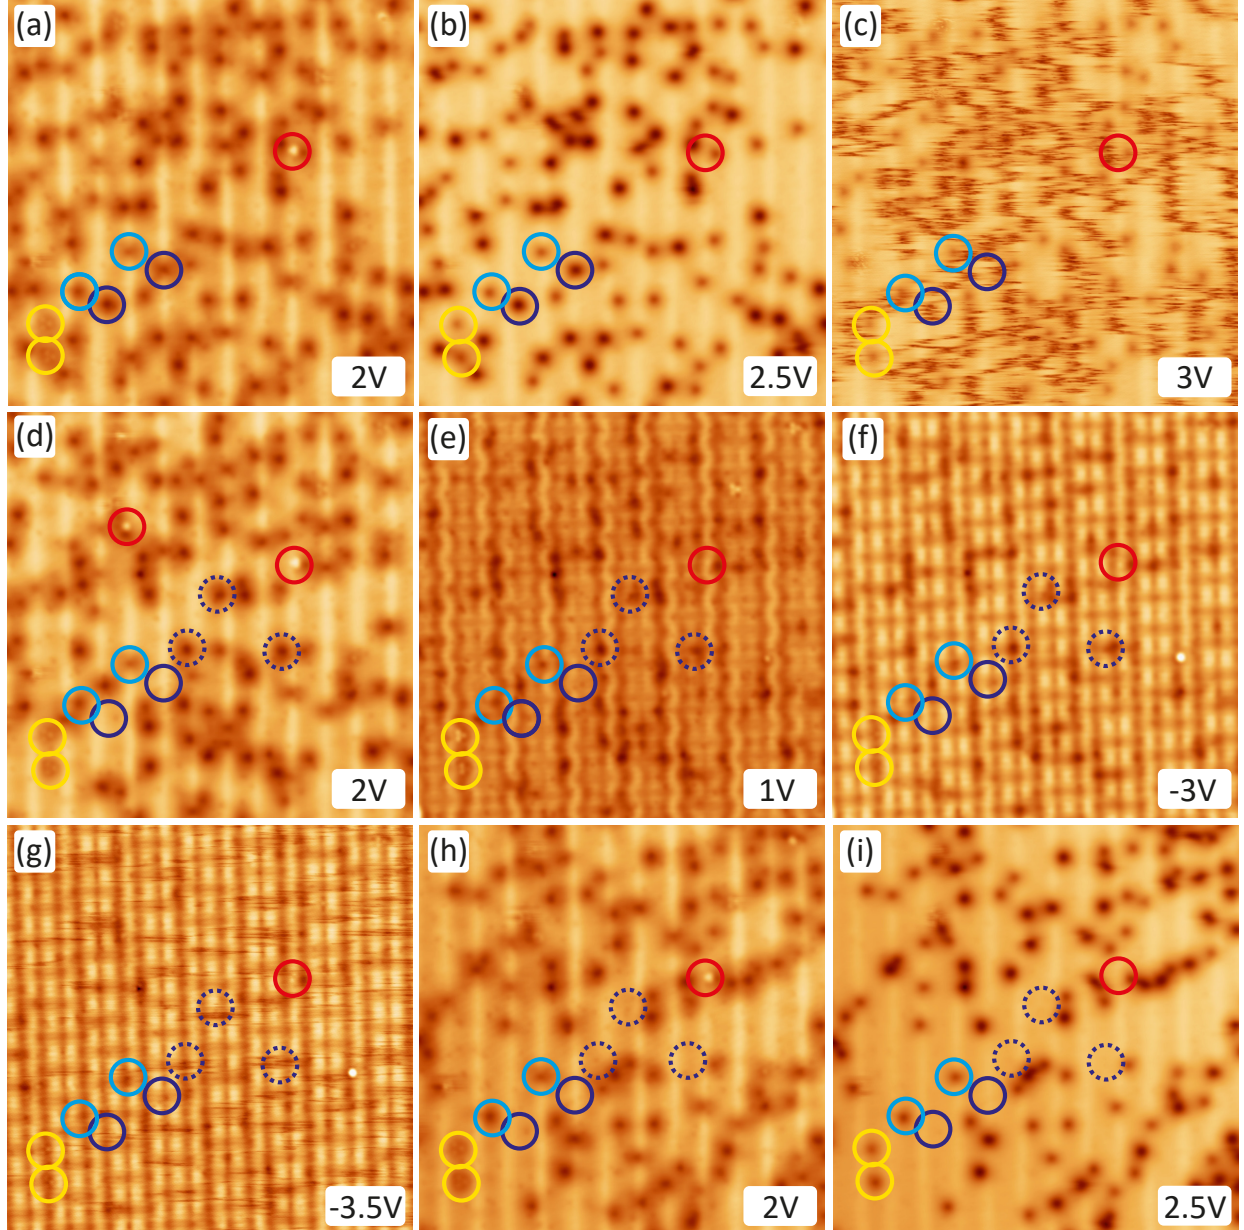

Figure S1. (a-i) Sequence of STM images of the same area acquired at varying  $V_b$  ranging from +3 V and -3.5 V, as indicated, and at  $I_t = 50$  pA. Selected polarons are encircled to track their position: dark blue (type-I mobile), light blue (type-I immobile), yellow (type-II 2x2), and red (type-II 1x1). From comparison of (d) and (h) it is obvious that type-I mobile polarons are also moved at  $V_b = -3.5$  V. Image sizes: 45 nm  $\times$  45 nm.

Figure S1 presents a complementary dataset to Figure 2 of the main text, extending the investigation to higher negative bias range. The behavior at positive  $V_b$  [Figure S1(a-e)] is consistent with our previous observations. The four types of polarons are distinguishable at  $V_b = 2\text{ V}$ , and type-I mobile polarons change positions after increasing  $V_b$  to  $3\text{ V}$ , as tracked by the polarons encircled dark blue in Figure S1(a-d).

The tip-induced mobility is also observed at negative  $V_b$ . If  $V_b$  is set to  $-3.5\text{ V}$  in Figure S1(g), type-I mobile polarons are mobile as obvious from the comparison of Figures S1(d) and (h) (check position in dotted dark blue circles).

**Supplementary note 2: Mobility of type-I mobile polaron for lower positive  $V_b$  at large tunneling current**

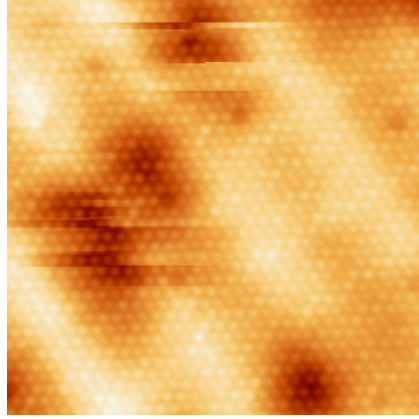

Figure S2. STM image acquired with  $V_b = 2\text{ V}$ ,  $I_t = 3\text{ nA}$ . Image size:  $15\text{ nm} \times 15\text{ nm}$ .

**Supplementary Note 3: Overview topographs of single-layer  $\text{MnBr}_2$  grown on different substrates.**

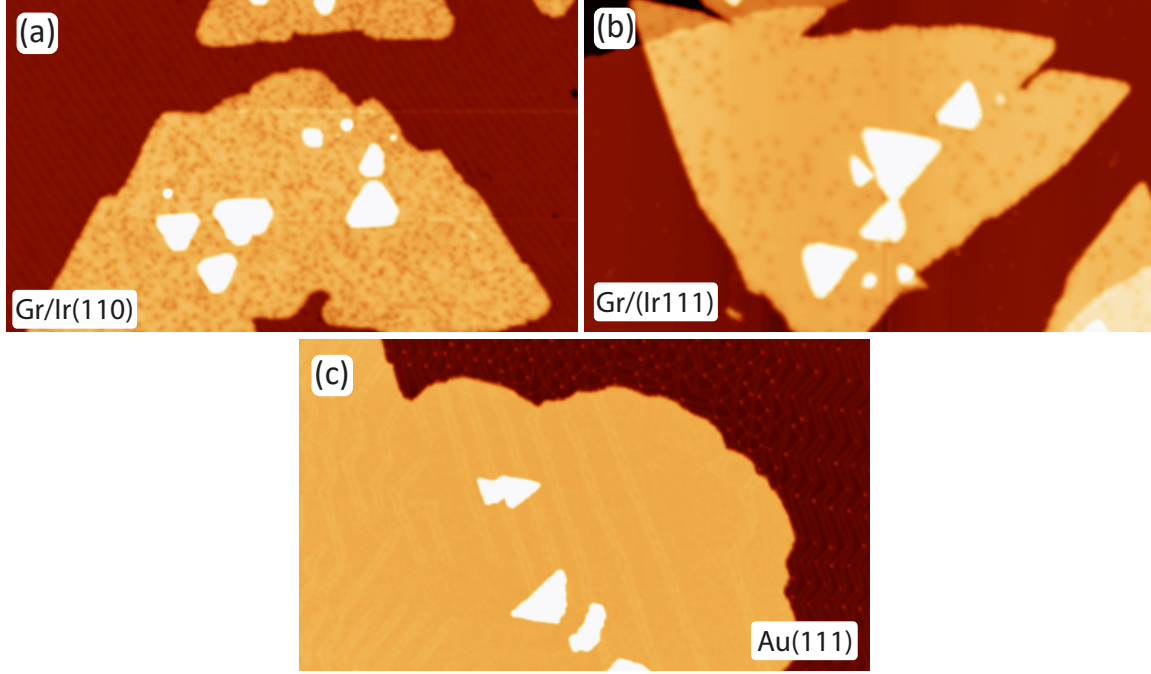

Figure S3. (a) Overview STM topographs of  $\text{MnBr}_2$  on (a) Gr/Ir(110), (b) Gr/Ir(111) and (c) Au (111). STM Imaging Parameters: (a)  $V_b = 3.5 \text{ V}$ ,  $I_t = 20 \text{ pA}$ , (b)  $V_b = 3.5 \text{ V}$ ,  $I_t = 20 \text{ pA}$ , (c)  $V_b = 2 \text{ V}$ ,  $I_t = 50 \text{ pA}$ . Image sizes:  $240 \text{ nm} \times 140 \text{ nm}$ .

On top of single-layer  $\text{MnBr}_2$  islands also small second-layer  $\text{MnBr}_2$  islands are visible. The overview STM image of  $\text{MnBr}_2$  on Au(111) in Figure S3 shows the herringbone reconstruction in the island, which is only partly lifted by  $\text{MnBr}_2$  overgrowth.

#### Supplementary note 4: Polarons in $\text{MnBr}_2$ on Gr/Ir(111)

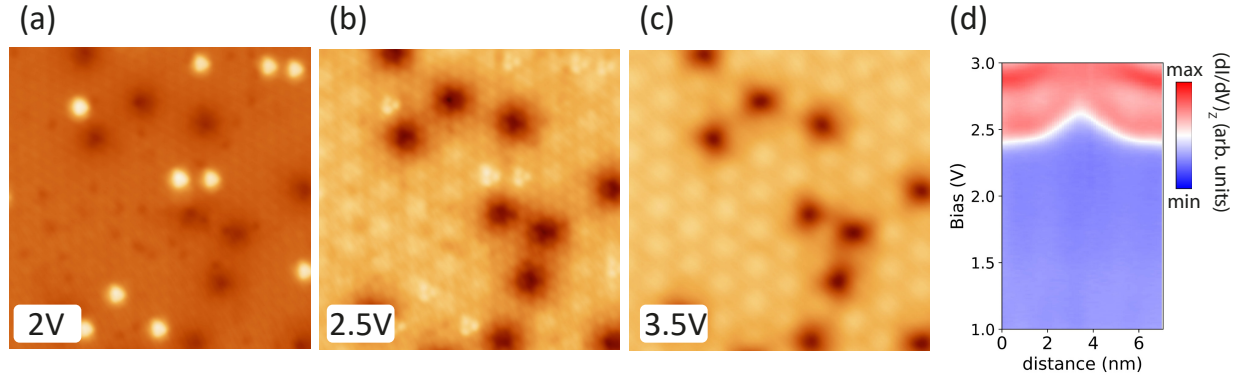

Figure S4. (a-c) Consecutive STM topographs of  $\text{MnBr}_2$  on Gr/Ir(111) at different  $V_b$  as indicated. (d) Constant current  $dI/dV$  linescan map over the type-I immobile, Spectra are acquired with  $V_{st} = +3$  V,  $I_{st} = 50$  pA,  $f_{mod} = 667$  Hz, and  $V_{mod} = 20$  mV. STM imaging parameters:  $I_t = 50$  pA. Image sizes:  $18 \text{ nm} \times 18 \text{ nm}$ .

**Supplementary note 5: Tip induced conversions of type-II 1x1 polarons into type-I mobile polarons.**

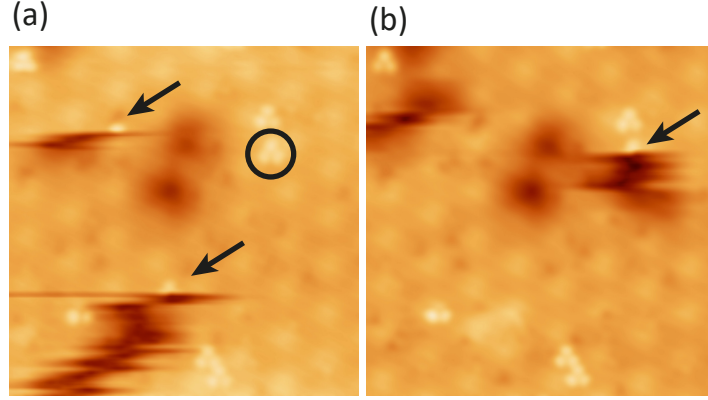

Figure S5. (a,b) Consecutive STM topographs of  $\text{MnBr}_2$  on  $\text{Gr}/\text{Ir}(111)$ . The black arrows in (a) indicate locations where the STM tip induces a conversion from a type-II 1x1 polaron to type-I mobile polaron. Additionally, also the type-II 1x1 polaron circled in (a) has converted to a type I mobile polaron in (b), as highlighted by the arrow in (b). STM imaging parameters:  $V_b = 2.5 \text{ V}$ ,  $I_t = 50 \text{ pA}$ . Image sizes:  $18 \text{ nm} \times 18 \text{ nm}$ .

Figure S5 demonstrates conversions of type-II 1x1 polarons to type-I mobile polarons induced during STM scanning. After these conversions, the type-I mobile polarons move with the tip, appearing as fuzzy and continuous dark features in the topographs.



**Supplementary note 6: Creation of a type-I 1x1 mobile polaron in  $\text{MnBr}_2$  on Gr/Ir(111).**

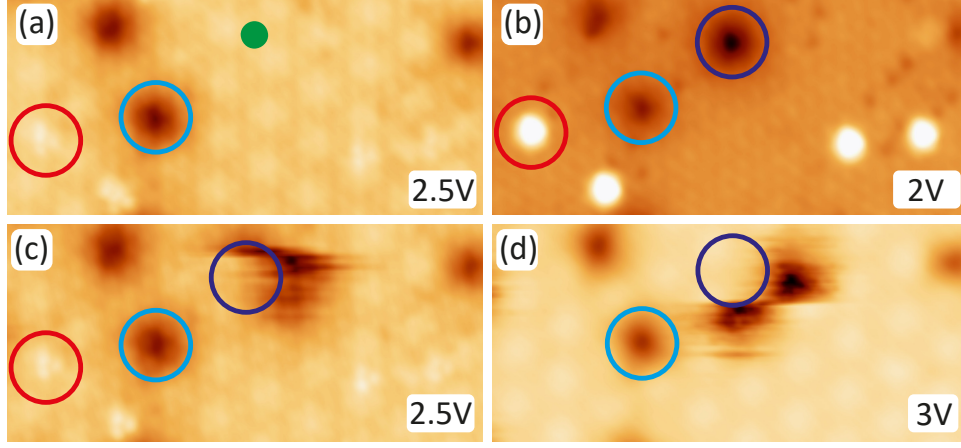

Figure S6. Sequence of STM images illustrating the creation of a type-I mobile polaron in  $\text{MnBr}_2$  on Gr/Ir(111) via bias pulsing. (a) STM topograph before bias pulsing with pre-existing type-II 1x1 and type-I immobile polarons (circled red and light blue, respectively). (b) STM topograph after bias pulse with  $V_b = +3.5 \text{ V}$  and  $I_t = 500 \text{ pA}$  at green dot in (a). (c,d) Subsequent imaging at higher biases shows the mobile polaron moving under the influence of the STM tip.  $I_t = 50 \text{ pA}$ . Image sizes:  $22 \text{ nm} \times 10 \text{ nm}$ .

Figure S6 shows the creation of a type-I mobile polaron. A bias pulse ( $V_b = +3.5 \text{ V}$ ,  $I_t = 500 \text{ pA}$ ) is applied at the green spot in Figure S6 (a). Subsequent imaging at  $V_b = +2 \text{ V}$ , as shown in Figure S6(b), reveals a type-I mobile polaron (encircled purple) at pulse location along with pre-existing type-I immobile (encircled blue) and type-II 1x1 polarons (encircled red). In subsequent imaging at  $V_b = +2.5 \text{ V}$  and  $+3 \text{ V}$  in Figure S6(c) and (d) the observed mobility of the polaron justifies its classification as type-I mobile polaron.

**Supplementary note 7: Bias dependent absolute tip heights above Gr/Ir(110) and MnBr<sub>2</sub>/Gr/Ir(110).**

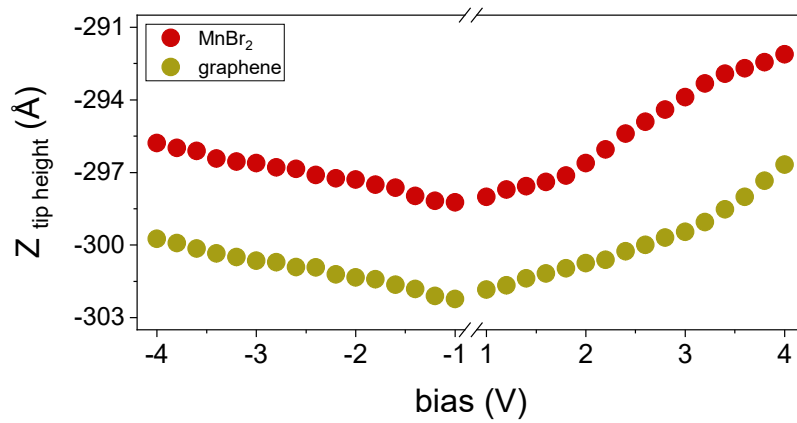

Figure S7. Absolute heights of the STM tip over Gr/Ir(110) (red squares, right  $y$ -axis) and MnBr<sub>2</sub>/Gr/Ir(110) (black squares, left  $y$ -axis) for  $I_t = 20$  pA as a function of  $V_b$ .
